# Supplementary material
Source: PubMed Central journal article supplement (PMC3055192)
Supplement: cc0920_4068SD1.pdf [file cc0920_4068SD1.pdf]

| Gene          | Classification | p53 response element |    |        |               |       |       |
|---------------|----------------|----------------------|----|--------|---------------|-------|-------|
|               |                | half-site 1          |    | spacer | half-site 2   |       |       |
| 14-3-3s #1    | non-apoptotic  | AGGCA                |    | TGTGC  |               | CACCA | TGCCC |
| 14-3-3s #2    | non-apoptotic  | GtAGCA               | tt | AGCCC  |               | AGACA | TGTCC |
| B99           | non-apoptotic  | GAGCA                |    | AGTTG  |               | GGGCT | TGCCT |
| BTG2          | non-apoptotic  | AGTCC                |    | GGGCA  | g             | AGCCC | GAGCA |
| CCNG1         | non-apoptotic  | GCACA                |    | AGCCC  |               | AGGCT | AGTCC |
| Cyclin G      | non-apoptotic  | AGACC                |    | TGCCC  |               | GGGCA | AGCCT |
| Cyclin G,C    | non-apoptotic  | AGGCT                |    | TGCCC  |               | GGGCA | GGTCT |
| GADD45A       | non-apoptotic  | GAACA                |    | TGTCT  |               | AAGCA | TGCTG |
| GDF           | non-apoptotic  | CATCT                |    | TGCCC  |               | AGACT | TGTCT |
| GDF           | non-apoptotic  | AGCCA                |    | TGCCC  |               | GGGCA | AGAAC |
| gml           | non-apoptotic  | ATGCT                |    | TGCCC  |               | AGGCA | TGTCC |
| mdm2          | non-apoptotic  | AGTTA                |    | AGTCC  |               | TGACT | TGTCT |
| mdm2          | non-apoptotic  | GGTCA                |    | AGTTG  |               | GGACA | CGTTC |
| MDM2-RE2      | non-apoptotic  | GAGCT                | a  | AGTCC  |               | TGACA | TGTCT |
| mdr1b         | non-apoptotic  | GAACA                |    | TGTAG  |               | AGACA | TGTCT |
| mmP2          | non-apoptotic  | AGACA                |    | AGCCT  |               | GAACT | TGTCT |
| p21-3'        | non-apoptotic  | GAAGA                |    | AGACT  |               | GGGCA | TGTCT |
| p21-5'        | non-apoptotic  | GAACA                |    | TGTCC  |               | CAACA | TGTTG |
| p53R2         | non-apoptotic  | TGACA                |    | TGCCC  |               | AGGCA | TGTCT |
| PCBP4         | non-apoptotic  | GGTCT                |    | TGGCC  | ca            | GACTT | AGCAC |
| PCNA          | non-apoptotic  | ACATA                |    | TGCCC  |               | GGACT | TATTC |
| Pcna          | non-apoptotic  | GAACA                |    | AGTCC  |               | GGGCA | TATGT |
| PLK2          | non-apoptotic  | GGTCA                |    | TGATT  | cct           | TAACT | TGCCT |
| PLK2          | non-apoptotic  | AAACA                |    | TGCCT  |               | GGACT | TGCCC |
| PLK2          | non-apoptotic  | AGACA                |    | TGGTG  | tgt           | AAACT | AGCTT |
| RB            | non-apoptotic  | GGGCG                |    | TGCCC  | cgc           | GTGCG | CGCGC |
| RGC           | non-apoptotic  | TGCCT                |    | TGCCT  | ggact         | TGCCT | GGCCT |
| RGC, O        | non-apoptotic  | GGACT                |    | TGCCT  |               | GGCCT | TGCCT |
| S100A2        | non-apoptotic  | GGGCA                |    | TGTGT  |               | GGGCA | CGTTC |
| SCARA         | non-apoptotic  | GGGCA                |    | AGCCC  |               | AGACA | AGTTG |
| TGFA          | non-apoptotic  | AGCCA                |    | AGTCT  |               | TGGCA | AGCGG |
| TGFA          | non-apoptotic  | GGGCA                |    | GGCCC  |               | TGCCT | AGTCT |
| APAF1         | apoptotic      | AGGCA                |    | CGTCC  | ccagcga       | CAGCA | GGCTC |
| APAF1         | apoptotic      | AGACA                |    | TGTCT  | ggagaccctagga | CGACA | AGCCC |
| Bax-A         | apoptotic      | TCACA                |    | AGTTA  | g             | AGACA | AGCCT |
| BAX-B,A       | apoptotic      | AGACA                |    | AGCCT  |               | GGGCG | TGGGC |
| BAX-human     | apoptotic      | GGGCA                |    | GGCCC  |               | GGGCT | TGTCG |
| BAX-mouse     | apoptotic      | AGGCA                |    | AGCTT  | t             | GAACT | TGCGG |
| cFOS,O        | apoptotic      | AGGCT                |    | TGCCC  |               | CGGCA | AGTTG |
| Ctsd          | apoptotic      | AACCT                |    | TGGTT  | tg            | CAAGA | GGCTT |
| fas           | apoptotic      | GGACA                |    | AGCCC  |               | TGACA | AGCCA |
| H-FAS,A       | apoptotic      | TGGCT                |    | TGTCA  |               | GGGCT | TGTCC |
| IGFBP3 A,A    | apoptotic      | AAACA                |    | AGCCA  | c             | CAACA | TGCTT |
| IGFBP3 B,A    | apoptotic      | GGGCA                |    | AGACC  |               | TGCCA | AGCCT |
| IRDD          | apoptotic      | AACCT                |    | TGGTT  | tg            | CAAGA | GGCTT |
| IRDD          | apoptotic      | AAGCT                |    | GGGCC  |               | GGGCT | GACCC |
| MCG10         | apoptotic      | GAACT                |    | TAAGA  | ccgaggctct    | GGACA | AGTTG |
| m-FAS         | apoptotic      | GGGCA                |    | TGTAC  |               | AAACA | TGTCA |
| NOXA          | apoptotic      | AGGCT                |    | TGCCC  |               | CGGCA | AGTTG |
| P2XM          | apoptotic      | GAACA                |    | AGGGC  | at            | GAGCT | TGTCT |
| p53aip1       | apoptotic      | TCTCT                |    | TGCCC  |               | GGGCT | TGTCG |
| pDINP1        | apoptotic      | GAACT                |    | TGGGG  |               | GAACA | TGTTT |
| PERP, 2097    | apoptotic      | GCGCT                |    | AGTCC  | acac          | AGACT | AGATT |
| PERP, 218     | apoptotic      | GCTCA                |    | AGTGT  | agcctt        | AGCCA | TGCTC |
| PIDD          | apoptotic      | AGGCC                |    | TGCCT  | gcgtgctg      | GGACA | AGTCT |
| PIG8          | apoptotic      | TGGCA                |    | GGCCG  |               | GAGCT | AGTTC |
| PUMA-BS1      | apoptotic      | CTCCT                |    | TGCCT  | t             | GGGCT | AGGCC |
| PUMA-BS2      | apoptotic      | CTGCA                |    | AGTCC  |               | TGACT | TGTCC |
| TNFRSF        | apoptotic      | GGGCA                |    | TGTCC  |               | GGGCA | AGACG |
| TP53i3 (PIG3) | apoptotic      | CAGCT                |    | TGCCC  |               | ACCCA | TGCTC |
